# Supplementary material
Source: HighWire-hosted journal article supplement (https://gut.bmj.com/content/65/12/1930)
Supplement: inline-supplementary-material-1 [file inline-supplementary-material-1.pdf]

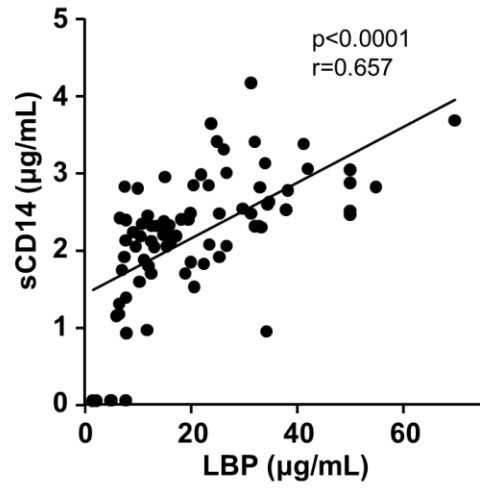

**Supplementary figure 1.** Correlation between serum levels of LBP and sCD14 in individuals with NCWS.

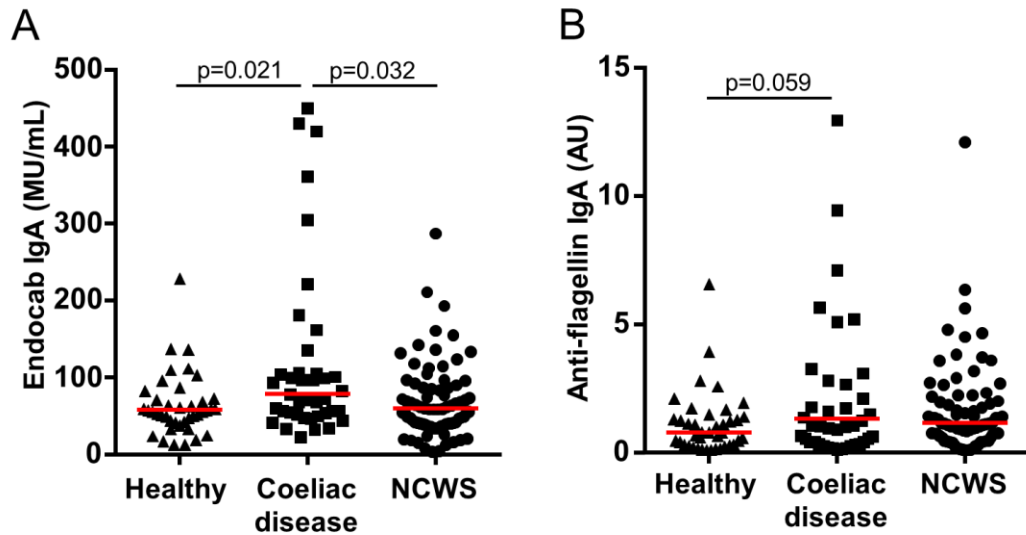

**Supplementary figure 2.** IgA responses to LPS and flagellin. Serum levels of (A) EndoCAB IgA and (B) IgA antibody to flagellin in cohorts of healthy controls, coeliac disease patients, and individuals identified as having NCWS. Horizontal red lines indicate the median for each cohort.

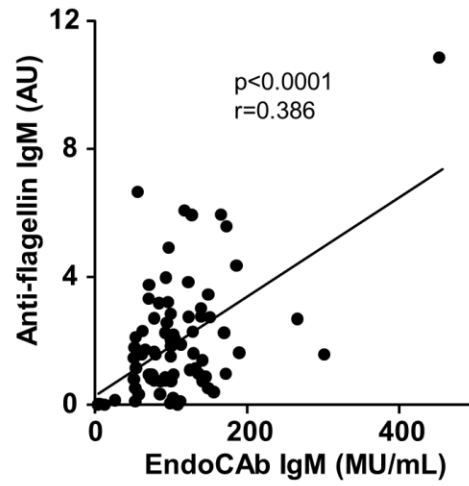

**Supplementary figure 3.** Correlation between serum levels of EndoCAb IgM and anti-flagellin IgM in NCWS individuals.

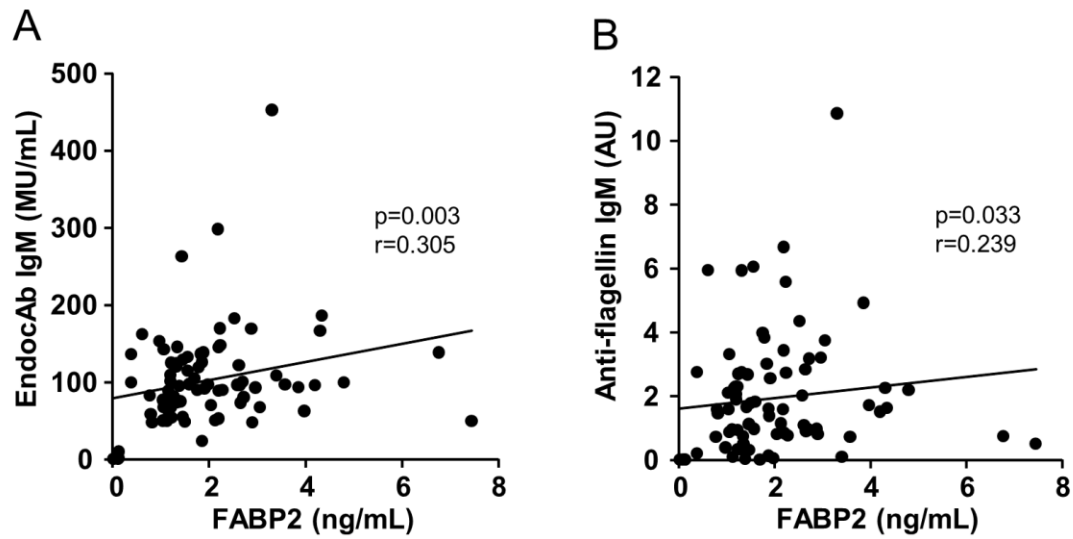

**Supplementary figure 4.** Correlation between serum levels of FABP2 and (A) EndoCAb IgM, and (B) anti-flagellin IgM in individuals with NCWS.

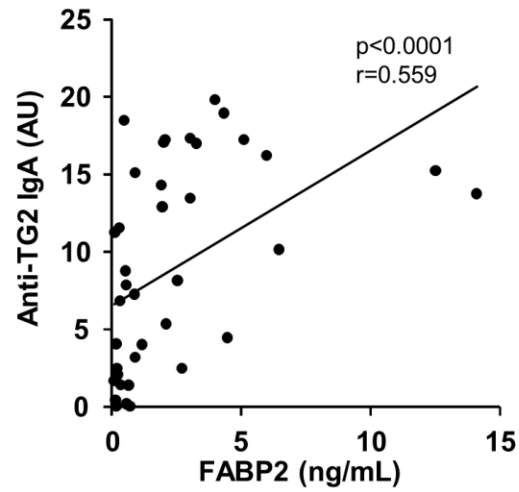

**Supplementary figure 5.** Correlation between serum levels of FABP2 and IgA antibody to TG2 in patients with coeliac disease.
